# Supplementary material
Source: PubMed Central journal article supplement (PMC4023448)
Supplement: hdy20143x2.pdf [file hdy20143x2.pdf]

## Supplementary Tables

**Table S1A.** Sampling localities and sample sizes. The abbreviations for the collecting localities used in the main text are given in parenthesis.

| Locality/Population                            | Sampling sites (SS)<br>Coordinates |                     | SS code | n<br>(COI) | n<br>(ITS-1) <sup>a</sup> | Current Forest<br>region |
|------------------------------------------------|------------------------------------|---------------------|---------|------------|---------------------------|--------------------------|
|                                                | <i>Longitude</i>                   | <i>Latitude</i>     |         |            |                           |                          |
| Reserva Biológica Augusto Ruschi (01-AR)       | -19.8781                           | -40.5385            | AR.1    | 10         | 7 (7)                     | CAF                      |
|                                                | -19.9123                           | -40.5362            | AR.2    | 1          | 1 (0)                     | CAF                      |
|                                                | -19.8875                           | -40.5362            | AR.3    | -          | 1 (1)                     | CAF                      |
| Parque Estadual do Desengano (04-ED)           | -21.8768                           | -41.9228            | ED.1    | 9          | 1 (1)                     | N-SAF                    |
|                                                | -21.8735                           | -41.9142            | ED.2    | 27         | 21 (20)                   | N-SAF                    |
| Parque Nacional da Serra dos Órgãos (07-SO)    | -22.4558                           | -42.9963            | SO.1    | 44         | 13 (10)                   | N-SAF                    |
| Parque Nacional da Serra da Bocaina (10-SB)    | -22.7474                           | -44.6181            | SB.1    | 6          | 6 (6)                     | N-SAF                    |
|                                                | -22.7339                           | -44.6164            | SB.2    | 2          | 1 (1)                     | N-SAF                    |
|                                                | -22.73 <sup>b</sup>                | -44.61 <sup>b</sup> | SB.3    | 2          | 2 (2)                     | N-SAF                    |
| Campos do Jordão (11-CJ)                       | -22.8039                           | -45.7768            | CJ.1    | 0          | 0                         | C-SAF                    |
| Parque Estadual da Serra da Cantareira (13-EC) | -23.4300                           | -46.6333            | EC.1    | 1          | -                         | C-SAF                    |
|                                                | -23.4592                           | -46.6373            | EC.2    | 12         | 10 (10)                   | C-SAF                    |
| Estação Biológica de Boraceia (16-BB)          | -23.6527                           | -45.8909            | BB.1    | 25         | 22 (22)                   | C-SAF                    |

|                                                     |          |          |      |     |           |       |
|-----------------------------------------------------|----------|----------|------|-----|-----------|-------|
| Praia de Cambury (19-PC)                            | -23.7520 | -45.6310 | PC.1 | 20  | 11 (11)   | C-SAF |
| Parque Estadual de Intervales (22-PI)               | -24.2749 | -48.4162 | PI.1 | 22  | 14 (12)   | C-SAF |
| -----                                               |          |          |      |     |           |       |
| Parque Nacional de Saint-Hilaire / Lange (25-SL)    | -25.7614 | -48.5933 | SL.1 | 1   | -         | S-SAF |
|                                                     | -25.7644 | -48.6227 | SL.2 | 1   | 1 (0)     | S-SAF |
|                                                     | -25.4622 | -48.8201 | SL.3 | 1   | -         | S-SAF |
|                                                     | -25.4722 | -48.8294 | SL.4 | 3   | -         | S-SAF |
|                                                     | -25.6911 | -48.5905 | SL.5 | 1   | 1 (0)     | S-SAF |
|                                                     | -25.7644 | -48.6227 | SL.6 | 2   | 2 (2)     | S-SAF |
| Parque Nacional da Serra de Itajaí (28-SI)          | -27.0484 | -49.0920 | SI.1 | 14  | 11 (11)   | S-SAF |
|                                                     | -26.9606 | -49.0676 | SI.2 | 1   | -         | S-SAF |
| Parque Estadual da Serra do Tabuleiro (31-ST)       | -27.9568 | -48.7735 | ST.1 | 3   | 2 (2)     | S-SAF |
|                                                     | -27.8417 | -48.9254 | ST.2 | 5   | 3 (3)     | S-SAF |
| Floresta Nacional de São Francisco de Paula (34-FN) | -29.4287 | -50.3884 | FN.1 | 0   | 0         | S-SAF |
| -----                                               |          |          |      |     |           |       |
| Total                                               |          |          |      | 213 | 130 (121) |       |

<sup>a</sup>Number of sequences used in the phylogenetic and in the population genetics (in parenthesis) analyses. <sup>b</sup> error < 5 km. NAF, North Atlantic Forest; CAF, Central Atlantic Forest; SAF, South Atlantic Forest (based on Cabanne *et al.* 2008); N-SAF, northern South Atlantic Forest; C-SAF, central South Atlantic Forest; S-SAF, southern South Atlantic Forest

**Table S1B.** *Cephaloflexa bergi* and outgroup specimens used in this study with their GenBank accession numbers. The abbreviations for the collecting localities used in the main text are given in parenthesis.

| Collecting locality                                        | Molecular code                                        | SS code            | N. MZUSP <sup>a</sup> | COI          | ITS-1    |   |
|------------------------------------------------------------|-------------------------------------------------------|--------------------|-----------------------|--------------|----------|---|
| Reserva Biológica. Augusto Ruschi / Espírito Santo (01-AR) | F2261 <sup>b</sup>                                    | AR.1               | MZUSP PL 1106         | KF971394     | KF971575 |   |
|                                                            | F2263 <sup>b</sup>                                    | AR.1               | MZUSP PL 355          | KF971395     | -        |   |
|                                                            | F2270 <sup>b</sup>                                    | AR.1               | MZUSP PL 1107         | KF971396     | KF971576 |   |
|                                                            | F2288 <sup>b</sup>                                    | AR.1               | MZUSP PL 356          | KF971397     | -        |   |
|                                                            | F2328 <sup>b</sup>                                    | AR.1               | MZUSP PL 1110         | KF971398     | KF971577 |   |
|                                                            | F2331                                                 | AR.1               | MZUSP PL 1111         | KF971399     | KF971578 |   |
|                                                            | F2345                                                 | AR.1               | MZUSP PL 1112         | -            | KF971579 |   |
|                                                            | F2380 <sup>b</sup>                                    | AR.1               | MZUSP PL 357          | KF971400     | -        |   |
|                                                            | F2395                                                 | AR.1               | MZUSP PL 1114         | KF971401     | KF971580 |   |
|                                                            | F2401                                                 | AR.1               | MZUSP PL 1115         | KF971402     | KF971581 |   |
|                                                            | F2408 <sup>b</sup>                                    | AR.1               | MZUSP PL 1116         | KF971403     | -        |   |
|                                                            | F2449 <sup>b</sup>                                    | AR.2               | MZUSP PL 1117         | KF971404     | KF971582 |   |
|                                                            | F2486 <sup>b</sup>                                    | AR.3               | MZUSP PL 359          | -            | KF971586 |   |
|                                                            | Parque Estadual do Desengano / Rio de Janeiro (04-ED) | F2159 <sup>b</sup> | ED.1                  | MZUSP PL 339 | KF971383 | - |
|                                                            |                                                       | F2160              | ED.1                  | MZUSP PL 340 | KF971384 | - |
|                                                            |                                                       | F2161              | ED.1                  | MZUSP PL 341 | KF971385 | - |
|                                                            |                                                       | F2162              | ED.1                  | MZUSP PL 342 | KF971558 | - |
| F2163                                                      |                                                       | ED.1               | MZUSP PL 343          | KF971386     | KF971572 |   |
| F2164                                                      |                                                       | ED.1               | MZUSP PL 344          | KF971387     | -        |   |
| F2165 <sup>b</sup>                                         |                                                       | ED.1               | MZUSP PL 345          | KF971388     | -        |   |
| F2166                                                      |                                                       | ED.1               | MZUSP PL 346          | KF971389     | -        |   |
| F2186                                                      |                                                       | ED.2               | MZUSP PL 347          | KF971390     | KF971573 |   |
| F2203                                                      |                                                       | ED.1               | MZUSP PL 352          | KF971391     | -        |   |
| F2220                                                      |                                                       | ED.2               | MZUSP PL 353          | KF971392     | KF971574 |   |
| F2222                                                      |                                                       | ED.2               | MZUSP PL 354          | KF971393     | -        |   |
| F3987                                                      |                                                       | ED.2               | MZUSP PL 620          | KF971451     | KF971616 |   |
| F4003                                                      |                                                       | ED.2               | MZUSP PL 621          | KF971452     | KF971617 |   |
| F4009                                                      |                                                       | ED.2               | MZUSP PL 622          | KF971453     | KF971618 |   |
| F4010                                                      |                                                       | ED.2               | MZUSP PL 623          | KF971454     | -        |   |
| F4013                                                      |                                                       | ED.2               | MZUSP PL 624          | KF971455     | KF971619 |   |
| F4015                                                      |                                                       | ED.2               | MZUSP PL 625          | KF971456     | -        |   |
| F4021                                                      |                                                       | ED.2               | MZUSP PL 626          | KF971457     | KF971620 |   |
| F4023                                                      |                                                       | ED.2               | MZUSP PL 627          | KF971458     | KF971621 |   |
| F4025                                                      |                                                       | ED.2               | MZUSP PL 628          | KF971459     | KF971622 |   |
| F4028                                                      |                                                       | ED.2               | MZUSP PL 629          | KF971460     | KF971623 |   |
| F4033                                                      |                                                       | ED.2               | MZUSP PL 630          | KF971461     | KF971624 |   |
| F4034                                                      |                                                       | ED.2               | MZUSP PL 631          | KF971462     | KF971625 |   |
| F4037                                                      |                                                       | ED.2               | MZUSP PL 632          | KF971463     | KF971626 |   |
| F4040                                                      |                                                       | ED.2               | MZUSP PL 633          | KF971464     | KF971627 |   |
| F4046                                                      |                                                       | ED.2               | MZUSP PL 634          | KF971465     | -        |   |
| F4058                                                      |                                                       | ED.2               | MZUSP PL 635          | KF971466     | KF971628 |   |
| F4064                                                      |                                                       | ED.2               | MZUSP PL 637          | KF971467     | -        |   |
| F4066                                                      |                                                       | ED.2               | MZUSP PL 638          | KF971468     | -        |   |
| F4069                                                      |                                                       | ED.2               | MZUSP PL 639          | KF971469     | KF971629 |   |
| F4075                                                      |                                                       | ED.2               | MZUSP PL 640          | KF971470     | KF971630 |   |
| F4077                                                      |                                                       | ED.2               | MZUSP PL 641          | KF971471     | KF971631 |   |
| F4086                                                      | ED.2                                                  | MZUSP PL 642       | KF971472              | KF971632     |          |   |
| F4091                                                      | ED.2                                                  | MZUSP PL 643       | KF971473              | KF971633     |          |   |
| F4093                                                      | ED.2                                                  | MZUSP PL 644       | KF971474              | KF971634     |          |   |
| Parque Nacional da Serra dos Órgãos / RJ (07-SO)           | F2573                                                 | SO.1               | MZUSP PL 360          | KF971405     | KF971587 |   |
|                                                            | F2603 <sup>b</sup>                                    | SO.1               | MZUSP PL 363          | KF971406     | -        |   |
|                                                            | F4184                                                 | SO.1               | MZUSP PL 854          | KF971498     | -        |   |
|                                                            | F4191                                                 | SO.1               | MZUSP PL 855          | KF971499     | -        |   |
|                                                            | F4192                                                 | SO.1               | MZUSP PL 856          | KF971500     | -        |   |
|                                                            | F4193                                                 | SO.1               | MZUSP PL 857          | KF971501     | -        |   |
|                                                            | F4196                                                 | SO.1               | MZUSP PL 858          | KF971502     | -        |   |

|                                                            |                    |      |              |          |          |
|------------------------------------------------------------|--------------------|------|--------------|----------|----------|
|                                                            | F4198              | SO.1 | MZUSP PL 859 | KF971503 | -        |
|                                                            | F4199              | SO.1 | MZUSP PL 860 | KF971504 | KF971655 |
|                                                            | F4201              | SO.1 | MZUSP PL 861 | KF971505 | -        |
|                                                            | F4204              | SO.1 | MZUSP PL 863 | KF971506 | -        |
|                                                            | F4205              | SO.1 | MZUSP PL 864 | KF971507 | KF971656 |
|                                                            | F4206              | SO.1 | MZUSP PL 865 | KF971508 | KF971657 |
|                                                            | F4207              | SO.1 | MZUSP PL 866 | KF971509 | KF971658 |
|                                                            | F4208              | SO.1 | MZUSP PL 867 | KF971510 | -        |
|                                                            | F4209              | SO.1 | MZUSP PL 868 | KF971511 | KF971659 |
|                                                            | F4211              | SO.1 | MZUSP PL 869 | KF971512 | -        |
|                                                            | F4213              | SO.1 | MZUSP PL 870 | KF971513 | -        |
|                                                            | F4214              | SO.1 | MZUSP PL 871 | KF971514 | -        |
|                                                            | F4258              | SO.1 | MZUSP PL 897 | KF971515 | -        |
|                                                            | F4260              | SO.1 | MZUSP PL 899 | KF971516 | -        |
|                                                            | F4265              | SO.1 | MZUSP PL 900 | KF971517 | -        |
|                                                            | F4267              | SO.1 | MZUSP PL 901 | KF971518 | KF971660 |
|                                                            | F4274              | SO.1 | MZUSP PL 905 | KF971519 | KF971661 |
|                                                            | F4286              | SO.1 | MZUSP PL 910 | KF971520 | KF971662 |
|                                                            | F4290              | SO.1 | MZUSP PL 913 | KF971521 | KF971663 |
|                                                            | F4298              | SO.1 | MZUSP PL 915 | KF971522 | -        |
|                                                            | F4299              | SO.1 | MZUSP PL 916 | KF971523 | -        |
|                                                            | F4300              | SO.1 | MZUSP PL 917 | KF971524 | -        |
|                                                            | F4302              | SO.1 | MZUSP PL 919 | KF971525 | -        |
|                                                            | F4303              | SO.1 | MZUSP PL 920 | KF971526 | KF971664 |
|                                                            | F4304              | SO.1 | MZUSP PL 921 | KF971527 | -        |
|                                                            | F4305              | SO.1 | MZUSP PL 922 | KF971528 | -        |
|                                                            | F4306              | SO.1 | MZUSP PL 923 | KF971529 | -        |
|                                                            | F4307              | SO.1 | MZUSP PL 924 | KF971530 | KF971665 |
|                                                            | F4308              | SO.1 | MZUSP PL 925 | KF971531 | -        |
|                                                            | F4309              | SO.1 | MZUSP PL 926 | KF971532 | -        |
|                                                            | F4315              | SO.1 | MZUSP PL 928 | KF971533 | -        |
|                                                            | F4316              | SO.1 | MZUSP PL 929 | KF971534 | -        |
|                                                            | F4318              | SO.1 | MZUSP PL 930 | KF971535 | -        |
|                                                            | F4320              | SO.1 | MZUSP PL 931 | KF971536 | -        |
|                                                            | F4324              | SO.1 | MZUSP PL 932 | KF971537 | -        |
|                                                            | F4325              | SO.1 | MZUSP PL 933 | KF971538 | -        |
|                                                            | F4326              | SO.1 | MZUSP PL 934 | KF971539 | KF971666 |
| Parque Nacional Serra da Bocaina / São Paulo<br>(10-SB)    | F2109 <sup>b</sup> | SB.1 | MZUSP PL 328 | HQ026416 | HQ026455 |
|                                                            | F2794              | SB.1 | MZUSP PL 397 | HQ026433 | HQ026461 |
|                                                            | F2800 <sup>b</sup> | SB.3 | MZUSP PL 398 | HQ026434 | HQ026462 |
|                                                            | F2801 <sup>b</sup> | SB.3 | MZUSP PL 399 | HQ026435 | HQ026463 |
|                                                            | F2804 <sup>b</sup> | SB.1 | MZUSP PL 400 | HQ026436 | HQ026464 |
|                                                            | F2805 <sup>b</sup> | SB.1 | MZUSP PL 401 | HQ026437 | HQ026465 |
|                                                            | F2811 <sup>b</sup> | SB.2 | MZUSP PL 402 | HQ026438 | HQ026466 |
|                                                            | F2837 <sup>b</sup> | SB.2 | MZUSP PL 405 | HQ026440 | -        |
|                                                            | F2845 <sup>b</sup> | SB.1 | MZUSP PL 407 | HQ026423 | HQ026470 |
|                                                            | F2846 <sup>b</sup> | SB.1 | MZUSP PL 408 | HQ026424 | HQ026471 |
| Parque Estadual Serra da Cantareira / São Paulo<br>(13-EC) | F2935              | EC.2 | MZUSP PL 422 | KF971413 | KF971593 |
|                                                            | F2986              | EC.2 | MZUSP PL 472 | KF971414 | KF971594 |
|                                                            | F2995              | EC.2 | MZUSP PL 473 | KF971415 | KF971595 |
|                                                            | F3008              | EC.2 | MZUSP PL 475 | KF971416 | KF971596 |
|                                                            | F3061              | EC.2 | MZUSP PL 479 | KF971417 | KF971597 |
|                                                            | F3066              | EC.2 | MZUSP PL 545 | KF971418 | KF971598 |
|                                                            | F3522              | EC.2 | MZUSP PL 548 | KF971437 | KF971610 |
|                                                            | F3524              | EC.2 | MZUSP PL 549 | KF971438 | -        |
|                                                            | F3530              | EC.2 | MZUSP PL 550 | KF971439 | KF971611 |
|                                                            | F3534 <sup>b</sup> | EC.2 | MZUSP PL 551 | KF971440 | KF971612 |
|                                                            | F3546              | EC.2 | MZUSP PL 552 | KF971441 | -        |
|                                                            | F3703              | EC.1 | MZUSP PL 567 | KF971445 | -        |
|                                                            | F3742              | EC.2 | MZUSP PL 569 | KF971446 | KF971613 |
| Estação Biológica da Boraceia / São Paulo (16-             | F2138 <sup>b</sup> | BB.1 | MZUSP PL 337 | HQ026419 | HQ026458 |

|                                                |                    |      |              |          |          |
|------------------------------------------------|--------------------|------|--------------|----------|----------|
| BB)                                            | F2149              | BB.1 | MZUSP PL 338 | HQ026420 | HQ026459 |
|                                                | F4103              | BB.1 | MZUSP PL 811 | KF971475 | KF971635 |
|                                                | F4110              | BB.1 | MZUSP PL 813 | KF971476 | KF971636 |
|                                                | F4111              | BB.1 | MZUSP PL 814 | KF971477 | KF971637 |
|                                                | F4118              | BB.1 | MZUSP PL 815 | KF971478 | KF971638 |
|                                                | F4120              | BB.1 | MZUSP PL 816 | KF971479 | KF971639 |
|                                                | F4121              | BB.1 | MZUSP PL 817 | KF971480 | -        |
|                                                | F4122              | BB.1 | MZUSP PL 818 | KF971481 | KF971640 |
|                                                | F4123              | BB.1 | MZUSP PL 819 | KF971482 | -        |
|                                                | F4124              | BB.1 | MZUSP PL 820 | KF971483 | -        |
|                                                | F4126              | BB.1 | MZUSP PL 822 | KF971484 | KF971641 |
|                                                | F4127              | BB.1 | MZUSP PL 823 | KF971485 | KF971642 |
|                                                | F4147              | BB.1 | MZUSP PL 830 | KF971486 | KF971643 |
|                                                | F4148              | BB.1 | MZUSP PL 831 | KF971487 | KF971644 |
|                                                | F4149              | BB.1 | MZUSP PL 832 | KF971488 | KF971645 |
|                                                | F4150              | BB.1 | MZUSP PL 833 | KF971489 | KF971646 |
|                                                | F4164              | BB.1 | MZUSP PL 846 | KF971490 | KF971647 |
|                                                | F4165              | BB.1 | MZUSP PL 847 | KF971491 | KF971648 |
|                                                | F4166              | BB.1 | MZUSP PL 848 | KF971492 | KF971649 |
|                                                | F4167              | BB.1 | MZUSP PL 849 | KF971493 | KF971650 |
|                                                | F4168              | BB.1 | MZUSP PL 850 | KF971494 | KF971651 |
|                                                | F4174              | BB.1 | MZUSP PL 851 | KF971495 | KF971652 |
|                                                | F4175              | BB.1 | MZUSP PL 852 | KF971496 | KF971653 |
|                                                | F4176              | BB.1 | MZUSP PL 853 | KF971497 | KF971654 |
| Cambury / São Paulo (19-PC)                    | F1034              | PC.1 | MZUSP PL 303 | KC608238 | -        |
|                                                | F1035              | PC.1 | MZUSP PL 304 | KF971364 | KF971559 |
|                                                | F1038              | PC.1 | MZUSP PL 305 | KC608240 | -        |
|                                                | F1045              | PC.1 | MZUSP PL 306 | KF971365 | -        |
|                                                | F1048              | PC.1 | MZUSP PL 307 | KF971366 | KF971560 |
|                                                | F4337              | PC.1 | MZUSP PL 939 | KF971540 | KF971667 |
|                                                | F4338 <sup>b</sup> | PC.1 | MZUSP PL 940 | KF971541 | KF971668 |
|                                                | F4339              | PC.1 | MZUSP PL 941 | KF971542 | KF971669 |
|                                                | F4350 <sup>b</sup> | PC.1 | MZUSP PL 951 | KF971543 | KF971670 |
|                                                | F4352              | PC.1 | MZUSP PL 952 | KF971544 | -        |
|                                                | F4355              | PC.1 | MZUSP PL 953 | KF971545 | KF971671 |
|                                                | F4356              | PC.1 | MZUSP PL 954 | KF971546 | -        |
|                                                | F4378              | PC.1 | MZUSP PL 974 | KF971547 | -        |
|                                                | F4380              | PC.1 | MZUSP PL 975 | KF971548 | -        |
|                                                | F4401              | PC.1 | MZUSP PL 991 | KF971549 | KF971672 |
|                                                | F4403              | PC.1 | MZUSP PL 992 | KF971550 | KF971673 |
|                                                | F4404              | PC.1 | MZUSP PL 993 | KF971551 | -        |
|                                                | F4407              | PC.1 | MZUSP PL 994 | KF971552 | KF971674 |
|                                                | F4408              | PC.1 | MZUSP PL 995 | KF971553 | -        |
|                                                | F4410              | PC.1 | MZUSP PL 996 | KF971554 | KF971675 |
| Parque Estadual Intervales / São Paulo (22-PI) | F2644 <sup>b</sup> | PI.1 | MZUSP PL 370 | KF971407 | KF971588 |
|                                                | F2697              | PI.1 | MZUSP PL 377 | KF971408 | KF971589 |
|                                                | F2698              | PI.1 | MZUSP PL 378 | KF971409 | -        |
|                                                | F2702              | PI.1 | MZUSP PL 379 | KF971410 | KF971590 |
|                                                | F2769              | PI.1 | MZUSP PL 389 | KF971411 | KF971591 |
|                                                | F2785              | PI.1 | MZUSP PL 392 | KF971412 | KF971592 |
|                                                | F3081              | PI.1 | MZUSP PL 480 | HQ026426 | -        |
|                                                | F3082              | PI.1 | MZUSP PL 481 | KF971419 | -        |
|                                                | F3088              | PI.1 | MZUSP PL 483 | KF971420 | -        |
|                                                | F3089              | PI.1 | MZUSP PL 484 | KF971421 | KF971599 |
|                                                | F3091              | PI.1 | MZUSP PL 485 | KF971422 | KF971600 |
|                                                | F3095              | PI.1 | MZUSP PL 486 | KF971423 | KF971601 |
|                                                | F3097              | PI.1 | MZUSP PL 487 | KF971424 | KF971602 |
|                                                | F3100              | PI.1 | MZUSP PL 489 | KF971425 | -        |
|                                                | F3101              | PI.1 | MZUSP PL 490 | KF971426 | KF971603 |
|                                                | F3104              | PI.1 | MZUSP PL 491 | KF971427 | -        |
|                                                | F3105              | PI.1 | MZUSP PL 492 | KF971428 | -        |

|                                                             |                             |                      |                                                 |                      |                                  |
|-------------------------------------------------------------|-----------------------------|----------------------|-------------------------------------------------|----------------------|----------------------------------|
|                                                             | F3109 <sup>b</sup>          | PI.1                 | MZUSP PL 494                                    | HQ026427             | HQ026474                         |
|                                                             | F3111                       | PI.1                 | MZUSP PL 496                                    | KF971429             | KF971604                         |
|                                                             | F3146                       | PI.1                 | MZUSP PL 500                                    | KF971430             | KF971605                         |
|                                                             | F3798                       | PI.1                 | MZUSP PL 615                                    | KF971447             | KF971614                         |
|                                                             | F3805                       | PI.1                 | MZUSP PL 616                                    | KF971448             | -                                |
| Parque Nacional Saint Hilaire / Paraná (25-SL)              | F1606                       | SL.1                 | MZUSP PL 321                                    | KF971379             | -                                |
|                                                             | F1610 <sup>b</sup>          | SL.6                 | MZUSP PL 322                                    | KF971380             | KF971569                         |
|                                                             | F1616 <sup>b</sup>          | SL.6                 | MZUSP PL 323                                    | KF971381             | KF971570                         |
|                                                             | F1628 <sup>b</sup>          | SL.2                 | MZUSP PL 324                                    | KF971382             | KF971571                         |
|                                                             | F1664 <sup>b</sup>          | SL.3                 | MZUSP PL 326                                    | HQ026401             | -                                |
|                                                             | F3583                       | SL.4                 | MZUSP PL 558                                    | KF971442             | -                                |
|                                                             | F3584                       | SL.4                 | MZUSP PL559                                     | KF971443             | -                                |
|                                                             | F3585                       | SL.4                 | MZUSP PL 560                                    | KF971444             | -                                |
|                                                             | F3611 <sup>b</sup>          | SL.5                 | MZUSP PL 565                                    | HQ026431             | HQ026478                         |
| Parque Nacional Serra de Itajaí / Santa Catarina (28-SI)    | F1528                       | SI.1                 | MZUSP PL 308                                    | KF971367             | -                                |
|                                                             | F1532                       | SI.1                 | MZUSP PL 309                                    | KF971368             | KF971561                         |
|                                                             | F1555                       | SI.2                 | MZUSP PL 310                                    | KF971369             | -                                |
|                                                             | F1570                       | SI.1                 | MZUSP PL 311                                    | KF971370             | -                                |
|                                                             | F1572 <sup>b</sup>          | SI.1                 | MZUSP PL 312                                    | KF971371             | KF971562                         |
|                                                             | F1576                       | SI.1                 | MZUSP PL 313                                    | -                    | KF971563                         |
|                                                             | F1580                       | SI.1                 | MZUSP PL 314                                    | KF971372             | KF971564                         |
|                                                             | F1582                       | SI.1                 | MZUSP PL 315                                    | KF971373             | KF971565                         |
|                                                             | F1583                       | SI.1                 | MZUSP PL 316                                    | KF971374             | -                                |
|                                                             | F1584                       | SI.1                 | MZUSP PL 317                                    | KF971375             | KF971566                         |
|                                                             | F1585 <sup>b</sup>          | SI.1                 | MZUSP PL 318                                    | KF971376             | -                                |
|                                                             | F1596                       | SI.1                 | MZUSP PL 319                                    | KF971377             | KF971567                         |
|                                                             | F1598                       | SI.1                 | MZUSP PL 320                                    | KF971378             | KF971568                         |
|                                                             | F4610                       | SI.1                 | MZUSP PL 1103                                   | KF971555             | KF971676                         |
|                                                             | F4635                       | SI.1                 | MZUSP PL 1104                                   | KF971556             | KF971677                         |
|                                                             | F4636                       | SI.1                 | MZUSP PL 1105                                   | KF971557             | KF971678                         |
| Parque Estadual Serra do Tabuleiro / Santa Catarina (31-ST) | F3230                       | ST.2                 | MZUSP PL 501                                    | KF971431             | -                                |
|                                                             | F3236 <sup>b</sup>          | ST.2                 | MZUSP PL 502                                    | KF971432             | KF971606                         |
|                                                             | F3257                       | ST.2                 | MZUSP PL 504                                    | KF971433             | KF971607                         |
|                                                             | F3295                       | ST.2                 | MZUSP PL 506                                    | KF971434             | KF971608                         |
|                                                             | F3306                       | ST.1                 | MZUSP PL 507                                    | KF971435             | KF971609                         |
|                                                             | F3313 <sup>b</sup>          | ST.2                 | MZUSP PL 510                                    | KF971436             | -                                |
|                                                             | F3906                       | ST.1                 | MZUSP PL 617                                    | KF971449             | KF971615                         |
|                                                             | F3913                       | ST.1                 | MZUSP PL 618                                    | KF971450             | -                                |
| Outgroup                                                    |                             |                      |                                                 |                      |                                  |
| <i>Choeradoplana banga</i><br>(13-EC)                       | F3011 <sup>b</sup>          |                      | MZUSP PL 477                                    | KC608301             | -                                |
| <i>Choeradoplana iheringi</i><br>(31-ST)<br>(34-FN)         | F3315<br>F3400 <sup>b</sup> |                      | MZUSP PL 511<br>MZUSP PL 521                    | HQ542891<br>HQ026429 | -<br>-                           |
| <i>Cephaloflexa</i> sp.<br>(01-AR)                          | F2473<br>F2474<br>F2477     | AR.2<br>AR.2<br>AR.2 | MZUSP PL 1118<br>MZUSP PL 1119<br>MZUSP PL 1120 | -<br>-<br>-          | KF971583<br>KF971584<br>KF971585 |

<sup>a</sup> Vouchers are deposited in the Museu de Zoologia da Universidade de São Paulo (MZUSP)

<sup>b</sup> Individuals whose internal anatomy has been analyzed morphologically

? GenBank accession number not available yet

- Sequence not obtained

**Table S2A.** Results of the neutrality tests for the COI gene

| Population | Neutrality test |          |                  |            |                  |                            |                 |
|------------|-----------------|----------|------------------|------------|------------------|----------------------------|-----------------|
|            | Tajima's $D$    |          |                  | Fu's $F_s$ |                  | Ramos-Onsins & Rozas $R_2$ |                 |
|            | $n$             | $D$      | 95% CI           | $F_s$      | 95% CI           | $R_2$                      | 95% CI          |
| 01-AR      | 11              | 1.464    | (-1.733 , 1.631) | 4.797      | (-1.950 , 4.848) | 0.245**                    | (0.097 , 0.219) |
| 04-ED      | 36              | 1.346    | (-1.691 , 1.817) | 2.558      | (-5.213 , 5.928) | 0.165                      | (0.061 , 0.186) |
| 07-SO      | 44              | -0.758   | (-1.700 , 1.920) | -3.28      | (-5.197 , 5.943) | 0.087                      | (0.055 , 0.180) |
| 10-SB      | 10              | -0.993   | (-1.739 , 0.167) | 1.842      | (-3.713 , 4.738) | 0.205                      | (0.104 , 0.235) |
| 13-EC      | 13              | 0.792    | (-1.685 , 1.872) | 0.514      | (-2.443 , 3.733) | 0.191                      | (0.111 , 0.266) |
| 16-BB      | 25              | -1.159   | (-1.686 , 1.941) | -3.176*    | (-2.550 , 3.960) | 0.082                      | (0.077 , 0.242) |
| 19-PC      | 20              | 2.167*   | (-1.746 , 1.638) | 3.964      | (-4.504 , 5.190) | 0.228**                    | (0.080 , 0.191) |
| 22-PI      | 22              | -0.686   | (-1.678 , 1.917) | -1.367     | (-2.756 , 4.043) | 0.103                      | (0.084 , 0.242) |
| 25-SL      | 9               | 0.549    | (-1.669 , 1.612) | 3.536      | (-1.580 , 5.057) | 0.207                      | (0.101 , 0.235) |
| 28-SI      | 15              | -2.283** | (-1.772 , 1.697) | -0.157     | (-4.548 , 5.229) | 0.232**                    | (0.089 , 0.209) |
| 31-ST      | 8               | 2.464**  | (-1.605 , 1.577) | 6.335*     | (-1.494 , 5.080) | 0.279**                    | (0.106 , 0.251) |

\* $P < 0.05$  \*\* $P < 0.01$ (two-tailed test)

| Population | Linkage Disequilibrium |          |                 |            |                 |
|------------|------------------------|----------|-----------------|------------|-----------------|
|            | $n$                    | $Z_{ns}$ | 95% CI          | Wall's $Q$ | 95% CI          |
| 01-AR      | 11                     | 0.577    | (0.168 , 0.649) | 0.489      | (0.102 , 0.597) |
| 04-ED      | 36                     | 0.358    | (0.046 , 0.502) | 0.417      | (0 , 0.518)     |
| 07-SO      | 44                     | 0.067    | (0.038 , 0.489) | 0.210      | (0 , 0.5)       |
| 10-SB      | 10                     | 0.481    | (0.142 , 0.717) | 0.467      | (0 , 0.692)     |
| 13-EC      | 13                     | 0.425    | (0.011 , 1)     | 0.500      | (0 , 1)         |
| 16-BB      | 25                     | 0.013    | (0.003 , 1)     | 0          | (0 , 1)         |
| 19-PC      | 20                     | 0.711**  | (0.113 , 0.543) | 0.595*     | (0.063 , 0.482) |
| 22-PI      | 22                     | 0.166    | (0.004 , 1)     | 0          | (0 , 1)         |
| 25-SL      | 9                      | 0.476    | (0.187 , 0.695) | 0.330      | (0.115 , 0.641) |
| 28-SI      | 15                     | 0.885**  | (0.116 , 0.625) | 0.877**    | (0 , 0.580)     |
| 31-ST      | 8                      | 0.913**  | (0.201 , 0.726) | 0.851**    | (0.119 , 0.679) |

\* $P < 0.05$  \*\* $P < 0.01$ (two-tailed test)

**Table S2B.** Results of the neutrality tests for the ITS-1 gene

| Population | Neutrality test |                   |                 |                           |                 |                                           |                |
|------------|-----------------|-------------------|-----------------|---------------------------|-----------------|-------------------------------------------|----------------|
|            | <i>n</i>        | Tajima's <i>D</i> |                 | Fu's <i>F<sub>s</sub></i> |                 | Ramos-Onsins & Rozas <i>R<sub>2</sub></i> |                |
|            |                 | <i>D</i>          | 95% CI          | <i>F<sub>s</sub></i>      | 95% CI          | <i>R<sub>2</sub></i>                      | 95% CI         |
| 01-AR      | 8               | -1.829**          | (-1.627, 1.634) | 6.094*                    | (-2.531, 4.727) | 0.315**                                   | (0.106, 0.254) |
| 04-ED      | 21              | -1.587            | (-1.653, 1.900) | -4.204**                  | (-2.608, 4.020) | 0.068**                                   | (0.090, 0.248) |
| 07-SO      | 10              | -1.116            | (-1.668, 1.830) | -2.082                    | (-2.481, 3.779) | 0.112*                                    | (0.123, 0.300) |
| 10-SB      | 9               | -                 | -               | -                         | -               | -                                         | -              |
| 13-EC      | 10              | -1.562            | (-1.562, 1.641) | 1.225                     | (-1.430, 2.429) | 0.300                                     | (0.146, 0.300) |
| 16-BB      | 22              | -1.162            | (-1.747, 1.797) | -0.957                    | (-5.262, 5.604) | 0.208*                                    | (0.075, 0.192) |
| 19-PC      | 11              | 1.826*            | (-1.721, 1.617) | 9.334**                   | (-2.907, 5.050) | 0.243*                                    | (0.097, 0.219) |
| 22-PI      | 12              | -1.865*           | (-1.747, 1.816) | -0.849                    | (-2.897, 4.278) | 0.156                                     | (0.108, 0.265) |
| 25-SL      | 2               | -                 | -               | -                         | -               | -                                         | -              |
| 28-SI      | 11              | -2.181**          | (-1.778, 1.713) | 9.321**                   | (-3.679, 4.652) | 0.287**                                   | (0.101, 0.232) |
| 31-ST      | 5               | 1.567             | (-1.203, 1.583) | 3.843                     | (-0.365, 5.095) | 0.283                                     | (0.102, 0.348) |

\**P* < 0.05 \*\**P* < 0.01 (two-tailed test)

| Population | Linkage Disequilibrium |                       |                |                 |                |
|------------|------------------------|-----------------------|----------------|-----------------|----------------|
|            | <i>n</i>               | <i>Z<sub>ns</sub></i> | 95% CI         | Wall's <i>Q</i> | 95% CI         |
| 01-AR      | 8                      | 0.927**               | (0.190, 0.747) | 0.910**         | (0.087, 0.72)  |
| 04-ED      | 21                     | 0.120                 | (0.004, 1)     | 0               | (0, 1)         |
| 07-SO      | 10                     | 0.188                 | (0.012, 1)     | 0.286           | (0, 1)         |
| 10-SB      | 9                      | -                     | -              | -               | -              |
| 13-EC      | 10                     | 1**                   | (0.012, 1)     | 1**             | (0, 1)         |
| 16-BB      | 22                     | -                     | -              | -               | -              |
| 19-PC      | 11                     | 0.850**               | (0.157, 0.657) | 0.898**         | (0.08, 0.612)  |
| 22-PI      | 12                     | 0.306                 | (0.018, 0.88)  | 0.818           | (0, 1)         |
| 25-SL      | 2                      | -                     | -              | -               | -              |
| 28-SI      | 11                     | 1**                   | (0.121, 0.724) | 1**             | (0, 0.706)     |
| 31-ST      | 5                      | 0.945**               | (0.281, 0.867) | 0.933**         | (0.182, 0.851) |

\**P* < 0.05 \*\**P* < 0.01 (two-tailed test)



**Table S3A.**  $D_{XY}$  values between populations for the COI dataset

|       |         |         |         |         |         |         |         |         |         |         |  |
|-------|---------|---------|---------|---------|---------|---------|---------|---------|---------|---------|--|
| 01-AR |         |         |         |         |         |         |         |         |         |         |  |
| 04-ED | 0.10390 |         |         |         |         |         |         |         |         |         |  |
| 07-SO | 0.09775 | 0.06699 |         |         |         |         |         |         |         |         |  |
| 10-SB | 0.09910 | 0.07293 | 0.06840 |         |         |         |         |         |         |         |  |
| 13-EC | 0.09127 | 0.09938 | 0.07811 | 0.08659 |         |         |         |         |         |         |  |
| 16-BB | 0.10096 | 0.09828 | 0.08653 | 0.10060 | 0.06512 |         |         |         |         |         |  |
| 19-PC | 0.10331 | 0.08933 | 0.07441 | 0.08044 | 0.07688 | 0.06104 |         |         |         |         |  |
| 22-PI | 0.09480 | 0.08802 | 0.07924 | 0.08472 | 0.03460 | 0.06456 | 0.07656 |         |         |         |  |
| 25-SL | 0.10273 | 0.10077 | 0.08573 | 0.09447 | 0.07908 | 0.07265 | 0.08364 | 0.07367 |         |         |  |
| 28-SI | 0.10445 | 0.10163 | 0.09125 | 0.08895 | 0.09435 | 0.08351 | 0.08496 | 0.09502 | 0.06446 |         |  |
| 31-ST | 0.10465 | 0.10704 | 0.09083 | 0.08812 | 0.09119 | 0.09314 | 0.09342 | 0.09420 | 0.08458 | 0.08201 |  |
|       | 01-AR   | 04-ED   | 07-SO   | 10-SB   | 13-EC   | 16-BB   | 19-PC   | 22-PI   | 25-SL   | 28-SI   |  |

$D_a$  values between populations for the COI dataset

|       |         |         |         |         |         |         |         |         |         |         |  |
|-------|---------|---------|---------|---------|---------|---------|---------|---------|---------|---------|--|
| 01-AR |         |         |         |         |         |         |         |         |         |         |  |
| 04-ED | 0.06887 |         |         |         |         |         |         |         |         |         |  |
| 07-SO | 0.06298 | 0.06222 |         |         |         |         |         |         |         |         |  |
| 10-SB | 0.06113 | 0.06495 | 0.06069 |         |         |         |         |         |         |         |  |
| 13-EC | 0.05779 | 0.09590 | 0.07488 | 0.08016 |         |         |         |         |         |         |  |
| 16-BB | 0.06785 | 0.09517 | 0.08368 | 0.09455 | 0.06357 |         |         |         |         |         |  |
| 19-PC | 0.04773 | 0.06375 | 0.04909 | 0.05191 | 0.05284 | 0.03738 |         |         |         |         |  |
| 22-PI | 0.06151 | 0.08473 | 0.07620 | 0.07848 | 0.03286 | 0.06319 | 0.05271 |         |         |         |  |
| 25-SL | 0.04372 | 0.07176 | 0.05698 | 0.06252 | 0.05161 | 0.04557 | 0.03407 | 0.04640 |         |         |  |
| 28-SI | 0.06617 | 0.09335 | 0.08323 | 0.07773 | 0.08762 | 0.07715 | 0.05613 | 0.08848 | 0.03220 |         |  |
| 31-ST | 0.04926 | 0.08165 | 0.06569 | 0.05979 | 0.06735 | 0.06967 | 0.04747 | 0.07054 | 0.03521 | 0.05337 |  |
|       | 01-AR   | 04-ED   | 07-SO   | 10-SB   | 13-EC   | 16-BB   | 19-PC   | 22-PI   | 25-SL   | 28-SI   |  |

**Table S3B.**  $D_{xy}$  values between populations for the ITS-1 dataset

|       |         |         |         |         |         |         |         |         |         |         |
|-------|---------|---------|---------|---------|---------|---------|---------|---------|---------|---------|
| 01-AR |         |         |         |         |         |         |         |         |         |         |
| 04-ED | 0.14229 |         |         |         |         |         |         |         |         |         |
| 07-SO | 0.11147 | 0.01067 |         |         |         |         |         |         |         |         |
| 10-SB | 0.14523 | 0.02961 | 0.02477 |         |         |         |         |         |         |         |
| 13-EC | 0.11647 | 0.08133 | 0.06187 | 0.09928 |         |         |         |         |         |         |
| 16-BB | 0.13243 | 0.11321 | 0.07787 | 0.12683 | 0.06952 |         |         |         |         |         |
| 19-PC | 0.14375 | 0.06566 | 0.05493 | 0.07159 | 0.09187 | 0.08632 |         |         |         |         |
| 22-PI | 0.11199 | 0.06517 | 0.05746 | 0.08568 | 0.01042 | 0.04717 | 0.07576 |         |         |         |
| 25-SL | 0.11138 | 0.07424 | 0.08064 | 0.08567 | 0.05710 | 0.06464 | 0.07919 | 0.05908 |         |         |
| 28-SI | 0.12505 | 0.10202 | 0.08995 | 0.10732 | 0.09505 | 0.11890 | 0.11101 | 0.08519 | 0.04098 |         |
| 31-ST | 0.15064 | 0.11912 | 0.10560 | 0.12159 | 0.11786 | 0.14746 | 0.13687 | 0.10914 | 0.08390 | 0.09721 |
|       | 01-AR   | 04-ED   | 07-SO   | 10-SB   | 13-EC   | 16-BB   | 19-PC   | 22-PI   | 25-SL   | 28-SI   |

$D_a$  values between populations for the ITS-1 dataset

|       |         |         |         |         |         |         |         |         |         |         |
|-------|---------|---------|---------|---------|---------|---------|---------|---------|---------|---------|
| 01-AR |         |         |         |         |         |         |         |         |         |         |
| 04-ED | 0.10657 |         |         |         |         |         |         |         |         |         |
| 07-SO | 0.08326 | 0.00858 |         |         |         |         |         |         |         |         |
| 10-SB | 0.11168 | 0.02835 | 0.02405 |         |         |         |         |         |         |         |
| 13-EC | 0.08337 | 0.07905 | 0.06116 | 0.09855 |         |         |         |         |         |         |
| 16-BB | 0.10011 | 0.11149 | 0.07716 | 0.12683 | 0.06905 |         |         |         |         |         |
| 19-PC | 0.08103 | 0.02943 | 0.0304  | 0.03582 | 0.05560 | 0.05301 |         |         |         |         |
| 22-PI | 0.07862 | 0.06228 | 0.05611 | 0.08332 | 0.00810 | 0.04484 | 0.04639 |         |         |         |
| 25-SL | 0.05357 | 0.03930 | 0.04709 | 0.05270 | 0.02341 | 0.03141 | 0.02661 | 0.02522 |         |         |
| 28-SI | 0.08741 | 0.09247 | 0.08241 | 0.09956 | 0.08670 | 0.11174 | 0.06976 | 0.07666 | 0.00490 |         |
| 31-ST | 0.08328 | 0.07646 | 0.06897 | 0.08189 | 0.07552 | 0.10608 | 0.06227 | 0.06585 | 0.02162 | 0.05160 |
|       | 01-AR   | 04-ED   | 07-SO   | 10-SB   | 13-EC   | 16-BB   | 19-PC   | 22-PI   | 25-SL   | 28-SI   |

**Table S4.**  $S_{nn}$  values for the COI dataset

|             |               |             |             |               |             |             |             |             |                     |                |
|-------------|---------------|-------------|-------------|---------------|-------------|-------------|-------------|-------------|---------------------|----------------|
| <b>Cb01</b> |               |             |             |               |             |             |             |             |                     |                |
| <b>Cb04</b> | 1 (0***)      |             |             |               |             |             |             |             |                     |                |
| <b>Cb07</b> | 1 (0***)      | 1 (0***)    |             |               |             |             |             |             |                     |                |
| <b>Cb10</b> | 1 (0***)      | 1 (0***)    | 1 (0***)    |               |             |             |             |             |                     |                |
| <b>Cb13</b> | 1 (0***)      | 1 (0***)    | 1 (0***)    | 1 (0***)      |             |             |             |             |                     |                |
| <b>Cb16</b> | 1 (0***)      | 1 (0***)    | 1 (0***)    | 1 (0***)      | 1 (0***)    |             |             |             |                     |                |
| <b>Cb19</b> | 1 (0***)      | 1 (0***)    | 1 (0***)    | 1 (0***)      | 1 (0***)    | 1 (0***)    |             |             |                     |                |
| <b>Cb22</b> | 1 (0***)      | 1 (0***)    | 1 (0***)    | 1 (0***)      | 1 (0***)    | 1 (0***)    | 1 (0***)    |             |                     |                |
| <b>Cb25</b> | 1 (0***)      | 1 (0***)    | 1 (0***)    | 1 (0***)      | 1 (0***)    | 1 (0***)    | 1 (0***)    | 1 (0***)    |                     |                |
| <b>Cb28</b> | 1 (0***)      | 1 (0***)    | 1 (0***)    | 1 (0***)      | 1 (0***)    | 1 (0***)    | 1 (0***)    | 1 (0***)    | 0,91667 (0,0002***) |                |
| <b>Cb31</b> | 1 (0,0002***) | 1 (0***)    | 1 (0***)    | 1 (0,0001***) | 1 (0***)    | 1 (0***)    | 1 (0***)    | 1 (0***)    | 1 (0,0002***)       | 0,95652 (0***) |
|             | <b>Cb01</b>   | <b>Cb04</b> | <b>Cb07</b> | <b>Cb10</b>   | <b>Cb13</b> | <b>Cb16</b> | <b>Cb19</b> | <b>Cb22</b> | <b>Cb25</b>         | <b>Cb28</b>    |

$S_{nn}$  values for the ITS-1 dataset

|             |                     |              |               |               |               |              |               |                |               |                     |
|-------------|---------------------|--------------|---------------|---------------|---------------|--------------|---------------|----------------|---------------|---------------------|
| <b>Cb01</b> |                     |              |               |               |               |              |               |                |               |                     |
| <b>Cb04</b> | 0,96552 (0***)      |              |               |               |               |              |               |                |               |                     |
| <b>Cb07</b> | 0,94444 (0***)      | 1 (0***)     |               |               |               |              |               |                |               |                     |
| <b>Cb10</b> | 0,94118 (0***)      | 1 (0***)     | 1 (0***)      |               |               |              |               |                |               |                     |
| <b>Cb13</b> | 0,94444 (0***)      | 1 (0***)     | 1 (0***)      | 1 (0,0002***) |               |              |               |                |               |                     |
| <b>Cb16</b> | 0,96667 (0***)      | 1 (0***)     | 1 (0***)      | 1 (0***)      | 1 (0***)      |              |               |                |               |                     |
| <b>Cb19</b> | 0,94737 (0,0001***) | 1 (0***)     | 1 (0***)      | 1 (0***)      | 1 (0***)      | 1 (0***)     |               |                |               |                     |
| <b>Cb22</b> | 0,95000 (0***)      | 1 (0***)     | 1 (0***)      | 1 (0***)      | 1 (0***)      | 1 (0***)     | 1 (0***)      |                |               |                     |
| <b>Cb25</b> | 0,90000 (0,0457*)   | 1 (0,0098**) | 1 (0,0160*)   | 1 (0,0198*)   | 1 (0,0165*)   | 1 (0,0038**) | 1 (0,0125*)   | 1 (0,0093**)   |               |                     |
| <b>Cb28</b> | 0,94737 (0***)      | 1 (0***)     | 1 (0***)      | 1 (0***)      | 1 (0,0001***) | 1 (0***)     | 1 (0***)      | 0,82343 (0***) | 1 (0,0123*)   |                     |
| <b>Cb31</b> | 0,92308 (0,0025**)  | 1 (0***)     | 1 (0,0003***) | 1 (0,0006***) | 1 (0,0004***) | 1 (0***)     | 1 (0,0001***) | 1 (0,0001***)  | 1 (0,0960 ns) | 0,93750 (0,0005***) |
|             | <b>Cb01</b>         | <b>Cb04</b>  | <b>Cb07</b>   | <b>Cb10</b>   | <b>Cb13</b>   | <b>Cb16</b>  | <b>Cb19</b>   | <b>Cb22</b>    | <b>Cb25</b>   | <b>Cb28</b>         |

\*\*\*  $P < 0.001$

**Table S5.**  $N_{st}$  values for the COI dataset

|       |         |         |         |         |         |         |         |         |         |         |  |
|-------|---------|---------|---------|---------|---------|---------|---------|---------|---------|---------|--|
| 01-AR |         |         |         |         |         |         |         |         |         |         |  |
| 04-ED | 0.66626 |         |         |         |         |         |         |         |         |         |  |
| 07-SO | 0.64612 | 0.93168 |         |         |         |         |         |         |         |         |  |
| 10-SB | 0.62066 | 0.89487 | 0.89122 |         |         |         |         |         |         |         |  |
| 13-EC | 0.63281 | 0.96719 | 0.96078 | 0.92929 |         |         |         |         |         |         |  |
| 16-BB | 0.67427 | 0.97036 | 0.96891 | 0.94326 | 0.97707 |         |         |         |         |         |  |
| 19-PC | 0.46780 | 0.71697 | 0.65999 | 0.64870 | 0.68762 | 0.61326 |         |         |         |         |  |
| 22-PI | 0.64918 | 0.96465 | 0.96362 | 0.92972 | 0.95059 | 0.97965 | 0.68866 |         |         |         |  |
| 25-SL | 0.43210 | 0.71792 | 0.66758 | 0.66795 | 0.65397 | 0.62621 | 0.41053 | 0.62982 |         |         |  |
| 28-SI | 0.63740 | 0.92180 | 0.91495 | 0.87805 | 0.93079 | 0.92541 | 0.66302 | 0.93316 | 0.49977 |         |  |
| 31-ST | 0.47707 | 0.76905 | 0.72718 | 0.68349 | 0.74168 | 0.75129 | 0.51358 | 0.75237 | 0.41925 | 0.65297 |  |
|       | 01-AR   | 04-ED   | 07-SO   | 10-SB   | 13-EC   | 16-BB   | 19-PC   | 22-PI   | 25-SL   | 28-SI   |  |

$N_{st}$  values for the ITS-1 dataset

|       |         |         |         |         |         |         |         |         |         |         |  |
|-------|---------|---------|---------|---------|---------|---------|---------|---------|---------|---------|--|
| 01-AR |         |         |         |         |         |         |         |         |         |         |  |
| 04-ED | 0.74508 |         |         |         |         |         |         |         |         |         |  |
| 07-SO | 0.74448 | 0.80500 |         |         |         |         |         |         |         |         |  |
| 10-SB | 0.76633 | 0.95816 | 0.97157 |         |         |         |         |         |         |         |  |
| 13-EC | 0.70811 | 0.97333 | 0.98904 | 0.99318 |         |         |         |         |         |         |  |
| 16-BB | 0.75257 | 0.98589 | 0.99132 | 1       | 0.99345 |         |         |         |         |         |  |
| 19-PC | 0.56608 | 0.43181 | 0.54374 | 0.48650 | 0.59249 | 0.61336 |         |         |         |         |  |
| 22-PI | 0.69604 | 0.95729 | 0.97732 | 0.97395 | 0.77792 | 0.95174 | 0.60792 |         |         |         |  |
| 25-SL | 0.48550 | 0.52841 | 0.58525 | 0.61675 | 0.40371 | 0.48441 | 0.33945 | 0.42386 |         |         |  |
| 28-SI | 0.69579 | 0.90843 | 0.91751 | 0.92886 | 0.91329 | 0.94158 | 0.62518 | 0.90229 | 0.11798 |         |  |
| 31-ST | 0.55899 | 0.6396  | 0.65087 | 0.67150 | 0.63652 | 0.72261 | 0.45856 | 0.59825 | 0.25782 | 0.52415 |  |
|       | 01-AR   | 04-ED   | 07-SO   | 10-SB   | 13-EC   | 16-BB   | 19-PC   | 22-PI   | 25-SL   | 28-SI   |  |

**Table S6.** Isolation-by-distance results comparing  $D_{xy}$  values and natural logarithms of geographical distances

| Localites             | COI     |        |                        | ITS-1   |        |                        |
|-----------------------|---------|--------|------------------------|---------|--------|------------------------|
|                       | Z       | r      | P-value ( $r \leq 0$ ) | Z       | r      | P-value ( $r \leq 0$ ) |
| <i>All localities</i> | 12.7441 | 0.5274 | 0.0003**               | 13.4694 | 0.4260 | 0.0025**               |

\*\* $p < 0.01$

**Table S7.** ABC results of the serial founder events models

| <b>Model</b> | <i>MD</i>             | <i>PP</i> | <i>P</i> -value |
|--------------|-----------------------|-----------|-----------------|
| Model 1      | $1.93 \times 10^{-6}$ | 0.427     | 0.023           |
| Model 2      | $1.38 \times 10^{-6}$ | 0.306     | 0.019           |
| Model 3      | $3.69 \times 10^{-7}$ | 0.143     | 0.011           |
| Model 4      | $8.38 \times 10^{-7}$ | 0.202     | 0.019           |

*MD*, marginal density under the GLM

*PP*, posterior probability

*P*-value, Likelihood of the observed data under the GLM relative to that of the retained simulations (using 5 PLS components)

Analysis based on 8 populations
